# Supplementary material
Source: PubMed Central journal article supplement (PMC9972247)
Supplement: jamainternmed-e227083-s002.pdf [file jamainternmed-e227083-s002.pdf]

# Statistical Analysis Plan for SPARC Trial

## Background

Alcohol use is a major cause of disability and death worldwide. To improve prevention and treatment addressing unhealthy alcohol use, experts recommend that alcohol-related care be integrated into primary care (PC). However, few healthcare systems do so. To address this gap, implementation researchers and clinical leaders at Kaiser Permanente Washington (KPWA) partnered to design a high-quality Program of Sustained Patient-centered Alcohol-related Care (SPARC).

The study aim is to evaluate the effectiveness of the SPARC implementation at improving alcohol-related care within 22 KPWA clinics as part of a stepped-wedge randomized implementation trial. Specifically, our primary objectives are to evaluate whether the SPARC implementation intervention increased (1) brief interventions for unhealthy alcohol use, and (2) initiation and engagement in treatment of alcohol use disorders (AUDs). Details on the specific components of the SPARC implementation are in the protocol paper (Glass et al. 2018).

**Trial registration:** [NCT02675777](https://clinicaltrials.gov/ct2/show/study/NCT02675777)

## Stepped-wedge trial design

To evaluate the effectiveness of the SPARC implementation, we are conducting a pragmatic stepped wedge trial in 22 KPWA clinics. The trial design (**Figure 1**) addressed several practical concerns of the health system while maintaining a rigorous evaluation of SPARC. The 22 clinics were randomized into 7 mutually exclusive groups of clinics (referred to as “waves”). Here we briefly summarize the features of the design; more detailed explanations for these requirements are described in the protocol paper (Glass et al. 2018):

- A few pairs of clinics were clustered together into larger single clinical sites for the purpose of receiving the SPARC implementation. This resulted in 19 distinct clinical sites, hereafter referred to as “sites.”
- The health system provided input on implementation timing by conducting a stratified randomization on the year of the implementation; the health system identified 9 sites that would be randomized in Year 1 (3 sites in each of 3 waves), and the remaining 10 sites that would be randomized in Years 2-3 (in two waves of 3 sites each and two waves of 2 sites each). We will refer to sites randomized in Year 1 as Y1 sites and sites randomized in Years 2-3 as Y2 sites.
- It was desired that one of the Y2 sites be in a wave with just a single other site
- It was desired that the final wave consist of only 2 sites.

For each wave, there was a 2-month preparatory period prior to the “launch date” of the 4-month period of active implementation. The “launch date” was specified at the time of randomization to study

|    |   | Intervention time point |   |   |   |   |   |   |   |   |
|----|---|-------------------------|---|---|---|---|---|---|---|---|
|    |   | Wave                    | 0 | 1 | 2 | 3 | 4 | 5 | 6 | 7 |
| Y1 | 1 |                         |   |   |   |   |   |   |   |   |
|    | 2 |                         |   |   |   |   |   |   |   |   |
|    | 3 |                         |   |   |   |   |   |   |   |   |
| Y2 | 4 |                         |   |   |   |   |   |   |   |   |
|    | 5 |                         |   |   |   |   |   |   |   |   |
|    | 6 |                         |   |   |   |   |   |   |   |   |
|    | 7 |                         |   |   |   |   |   |   |   |   |

**Figure 1:** Schematic illustrating the stepped wedge design, in which 19 sites were divided into 7 waves (2-3 sites per wave) and stratified across two groups (Y1 and Y2). Gray squares denote time periods in which the SPARC implementation was to be implemented based on randomization, which includes the active implementation period and the sustainment period (defined below).

42 wave. It was the date when each site was intended to start Behavioral Health Integration screening for  
43 all patients who came to the site.

#### 44 Randomization

45 As discussed above, randomization was to be stratified on the study year of implementation (Y1 vs. Y2).  
46 The 9 Y1 sites were randomly assigned to begin active implementation in one of 3 waves (3 sites per  
47 wave). Within Y2, the 4 implementation waves were to consist of 2 waves with 3 sites each, and 2 waves  
48 with 2 sites each. Given the requirements above that the last wave have just two sites and that one Y2  
49 site needed to be in a wave with just one other site (we will refer to this site as site A), we developed a  
50 randomization scheme to ensure that each site had the same probability of being assigned to each wave  
51 (0.2 probability to be assigned to Y2 wave 4 and 0.8/3 each for waves 1-3 of Y2) as follows. First, we  
52 randomly selected one of the first 3 waves to be the other 2-site wave. Then, we randomly assigned site  
53 A to wave 4 with probability 0.2 or to the other 2-site wave with probability 0.8. The remaining 9 Y2 sites  
54 were then to be randomly assigned to the other available slots. Under this randomization scheme,  
55 letting B denote an arbitrary site different from site A, we have:

- 56 •  $P(\text{site A assigned to wave 4}) = 0.2$
- 57 •  $P(\text{site B assigned to wave 4}) = P(\text{site B assigned to wave 4} \mid \text{A assigned to wave 4}) * P(\text{A assigned to wave 4}) + P(\text{site B assigned to wave 4} \mid \text{A not assigned to wave 4}) = 1/9 * 0.2 + 2/9 * 0.8 = 0.2$
- 58 •  $P(\text{site A assigned to wave } j) = P(\text{wave } j \text{ assigned to be the other 2-site wave}) * P(\text{site A assigned to wave } j \mid \text{wave } j \text{ assigned to be the other 2-site wave}) = 1/3 * 0.8, \text{ for } j = 1, 2, 3$
- 59 •  $P(\text{site B assigned to wave } j) = 1/3 * [1 - P(\text{site B assigned to wave 4})] = 0.8/3, \text{ for } j = 1, 2, 3$

#### 62 Allocation concealment

63 The random allocation sequences were generated by the study biostatistician (Dr. Bobb) after all of the  
64 KPWA sites were identified, including the pairing of clinics within 3 of the sites. Y1 sites were  
65 randomized to waves on January 22, 2016 and Y2 sites were randomized on October 7, 2016. The  
66 assigned waves are shown in **Table 1** below.

#### 67 Study sample

68 Our base study population consists of patients who had at least 1 visit to one of the 22 KPWA clinics  
69 during the period from January 1, 2015 to July 31, 2018, which consists of the period from  
70 approximately 1 year prior to the randomization date of the Y1 sites (January 22, 2016) through the end  
71 of active implementation in the last wave of sites.

#### 72 SPARC Implementation stages

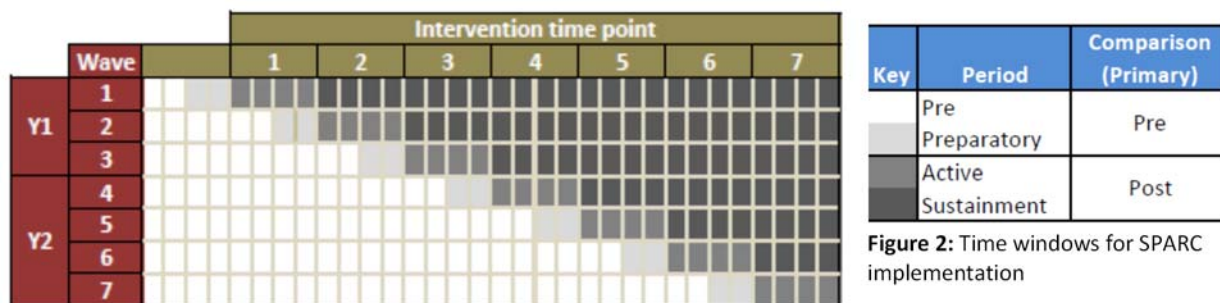

73 **Figure 2:** Time windows for SPARC  
74 implementation

73 Implementation time windows of interest are shown in **Figure 2**. The “preparatory period” is defined as  
74 the period 2 months prior to the SPARC launch date up until the launch, and the “active

75 implementation” period is defined as the period from 1-4 months after the SPARC launch date at a given  
 76 site. We will refer to the period up to and including the preparatory period as the “pre-implementation”  
 77 period, and the period starting with the launch date as the “post-implementation” period. Following  
 78 intention-to-treat principles, unless otherwise specified, these pre- and post-implementation periods  
 79 will be defined based on the launch dates during which active implementation was planned to occur  
 80 (shown in **Table 1**), rather than the actual date when the site begins implementing SPARC (if  
 81 implementation was delayed).

**Table 1.** Implementation wave dates and randomized assignments of sites to waves

| Year | Wave | Site (masked) | Launch Date                       |
|------|------|---------------|-----------------------------------|
| Y1   | 1    | Site A        | April 4 <sup>th</sup> , 2016      |
| Y1   | 1    | Site B        | April 11 <sup>th</sup> , 2016     |
| Y1   | 1    | Site C        | April 18 <sup>th</sup> , 2016     |
| Y1   | 2    | Site D        | September 7 <sup>th</sup> , 2016  |
| Y1   | 2    | Site E        | September 12 <sup>th</sup> , 2016 |
| Y1   | 2    | Site F        | September 19 <sup>th</sup> , 2016 |
| Y1   | 3    | Site G        | January 4 <sup>rd</sup> , 2017    |
| Y1   | 3    | Site H        | January 9 <sup>th</sup> , 2017    |
| Y1   | 3    | Site I        | January 16 <sup>th</sup> , 2017   |
| Y2   | 4    | Site J        | April 24 <sup>th</sup> , 2017     |
| Y2   | 4    | Site K        | April 24 <sup>th</sup> , 2017     |
| Y2   | 4    | Site L        | April 24 <sup>th</sup> , 2017     |
| Y2   | 5    | Site M        | August 14 <sup>th</sup> , 2017    |
| Y2   | 5    | Site N        | August 14 <sup>th</sup> , 2017    |
| Y2   | 5    | Site O        | August 14 <sup>th</sup> , 2017    |
| Y2   | 6    | Site P        | December 4 <sup>th</sup> , 2017   |
| Y2   | 6    | Site Q        | December 4 <sup>th</sup> , 2017   |
| Y2   | 7    | Site R        | April 9 <sup>th</sup> , 2018      |
| Y2   | 7    | Site S        | April 9 <sup>th</sup> , 2018      |

82

### 83 Outcome measures and time frames

84 The main primary and secondary outcome measures, as described in the Protocol Paper, are defined in  
 85 **Table 2** below. Indicator variables for each outcome are created at the level of the primary care visit  
 86 (since a patient may have multiple primary care visits during the study period). Measures are then  
 87 aggregated into time-intervals (e.g., weekly or monthly). For the primary analysis, measures are  
 88 aggregated into 28-day intervals (hereafter referred to as “months”), defined relative to the official  
 89 launch date of SPARC within the clinic (denoted by T0). For example, the co-primary alcohol brief  
 90 intervention measure aggregated at the monthly level is defined as the proportion of patients seen in  
 91 the month who had a brief intervention (defined in **Table 2**) at any point during that month.

**Table 2.** SPARC Trial Primary, Secondary and Other Outcomes from EHR and Claims Data

| Category                | Measure | Description |
|-------------------------|---------|-------------|
| <b>Primary Outcomes</b> |         |             |

|                              |                                                                                  |                                                                                                                                                                                                                            |
|------------------------------|----------------------------------------------------------------------------------|----------------------------------------------------------------------------------------------------------------------------------------------------------------------------------------------------------------------------|
| Prevention                   | Alcohol Brief Intervention                                                       | Indicator for whether a patient had a brief intervention documented in the EHR* on the day of, or in the 14 days following a PC visit, and had a positive alcohol screen on the day of the visit or in the prior 365 days* |
| Treatment                    | Treatment for Newly Diagnosed AUD (NCQA 2017 alcohol and drug treatment measure) | Indicator for whether a patient had a new AUD diagnosis* and initiated and engaged in AUD treatment*                                                                                                                       |
| <b>Intermediate Outcomes</b> |                                                                                  |                                                                                                                                                                                                                            |
| Prevention                   | Alcohol screening documented                                                     | Indicator for whether a patient had AUDIT-C screening documented in the EHR on the day of the visit or in the prior 365 days                                                                                               |
| Prevention                   | Positive alcohol screen                                                          | Indicator for whether a patient screened positive on the AUDIT-C (3–12 women and 4–12 men), on the most recent screen documented on the day of the visit or in the prior 365 days                                          |
| Prevention                   | High positive alcohol screen                                                     | Indicator for whether a patient had a high-positive AUDIT-C score (7–12 points), on the most recent screen documented on the day of the visit or in the prior 365 days                                                     |
| Assessment                   | Assessed for DSM-5 AUD symptoms                                                  | Indicator for whether a patient with a high-positive screen in the past year completed an AUD Symptom Checklist on the day of the visit or in the prior 365 days                                                           |
| Identification               | Past-year AUD diagnosis                                                          | Indicator for whether a patient had an AUD diagnosis defined as an ICD code for an AUD diagnosis per NCQA anywhere in or outside KPWA (e.g. includes claims) on the day of the PC visit or in the prior 365 days           |
| Identification               | New AUD diagnosis                                                                | Indicator that a “past-year AUD diagnosis” (defined immediately above) was new on the day of the PC visit, based on no AUD diagnosis in the prior 365 days                                                                 |
| Treatment                    | Initiation of AUD treatment (NCQA)                                               | Indicator for whether a patient received a “new AUD diagnosis” (defined above) and initiated AUD treatment in the following 14 days, per HEDIS ICD codes                                                                   |
| Treatment                    | Engagement in AUD treatment (NCQA)                                               | Indicator for whether a patient who initiated AUD treatment (defined above) had another 2 treatment visits in the following 30 days after initiation (“engagement”) per HEDIS ICD codes                                    |

\* Definitions based on intermediate outcomes;

EHR, electronic health record; HEDIS, Healthcare Effectiveness Data and Information Set; NCQA, U.S. National Committee for Quality Assurance

92

93 For each outcome measure above, we will perform the following comparisons of the monthly outcome  
94 rates (see **Figure 2** for definitions of implementation periods):

95 **Primary:** before vs. after the start of the active implementation period

96 **Secondary:**

- 97 (1) active implementation vs. pre period  
 98 (2) sustainment period vs. pre period  
 99 (3) sustainment period vs. active implementation

100 ADDENDUM NOTE: We plan to report analyses of these secondary time periods in a second manuscript.

## 101 Power calculations

102 Using the method of Hussey and Hughes (2007), power was calculated based on 19 sites and 7 study  
 103 waves (with the number of sites per wave as above), and with 4 months between waves. Calculations  
 104 assumed that the average number of patients seen in a site during a month was 1,205 patients, based  
 105 on 2014 data for these sites. We assumed the following pre-implementation rates for the main study  
 106 outcomes based on KPWA screening data from 2012 and treatment data from 2014:

- 107 • Alcohol brief intervention outcome (defined as the proportion of primary care patients seen in  
 108 the clinic who screened positive for unhealthy alcohol use and were given a brief intervention):  
 109 34.2 per 10,000 patients seen (0.342% = 19% screened x 36% screened positive x 5% brief  
 110 intervention). Note that the estimated percentage of patients who receive brief intervention is  
 111 unknown, and the value of 5% used here is thought to be an upper bound.
- 112 • NCQA treatment outcome (defined as the proportion of primary care patients seen in the clinic  
 113 who initiated and engaged in treatment): 3.9 per 10,000 (0.039% = 1.26% newly diagnosed x  
 114 37.5% initiating treatment x 8.2% engaged).

115 To account for within-site correlation of patient outcomes, we further assumed a value for the intraclass  
 116 correlation coefficient (ICC) of 0.001, equal to the observed ICC for AUD diagnosis rates across these  
 117 sites for a 6-month period based on 2014 data. Note that these calculations assume that the ICC is  
 118 constant over time, and that the correlation of patients from the same clinic at different time points is  
 119 the same as for patients from the same clinic at the same time point (Hemming, Taljaard, and Forbes  
 120 2017). Power was calculated based on a two-sided test and a type 1 error rate of 0.05.

121 Based on these calculations, we expect to have 80% (90%) power to detect an increase in brief  
 122 intervention rates of 7.1 (8.2) per 10,000 patients seen and an increase in the treatment outcome of 2.6  
 123 (3.1) per 10,000 patients seen. The following table shows power at other effect sizes:

| Outcome               | Assumed effect size:<br>change in number (per<br>10,000 patients seen)<br>before vs. after<br>implementation | Power |
|-----------------------|--------------------------------------------------------------------------------------------------------------|-------|
| Brief<br>Intervention | 6                                                                                                            | 0.67  |
|                       | 8                                                                                                            | 0.89  |
|                       | 10                                                                                                           | 0.97  |
| Treatment             | 2                                                                                                            | 0.60  |
|                       | 3                                                                                                            | 0.89  |
|                       | 4                                                                                                            | 0.98  |

## 124 Descriptive analyses

### 125 Descriptive statistics

126 We will generate summary statistics on the number of visits per person to a site during a monthly  
 127 period. At the patient level, we will describe demographic characteristics and clinical variables across  
 128 patients with a visit to a clinic in the pre-implementation period and patients with a visit in the post  
 129 implementation period. For time-varying disease status variables (e.g., the presence of a documented  
 130 diagnosis), characteristics will be summarized based on whether the patient had the disease  
 131 documented at any visit during the period (pre- or post-implementation), as well as based off of the  
 132 patient's first visit during the period. Additionally, as suggested by the CONSORT extension for stepped  
 133 wedge trials (Hemming et al. 2018), clinic and patient-level variables will be described by allocated  
 134 sequence (i.e., study wave).

### 135 **Crossover**

136 We will examine the proportion of visits in which the patient visited a site during the pre-  
 137 implementation period after having had a prior visit, to a different site during that site's post-  
 138 implementation period (main measure). Additionally, as a general measure of crossover across sites, for  
 139 each site we will compute the proportion of patients who had a visit at that site who also had a visit at  
 140 each of the other sites. As a measure of crossover across the implementation periods, we will compute  
 141 the proportion of patients who had a visit both before and after the launch date, overall and by site.

### 142 **Graphical analysis of study outcomes**

143 To visualize how the study outcomes change over time within a site, as well as pre- versus post-  
 144 implementation, we will plot the site-specific, crude (unadjusted) rates of the study outcomes as a  
 145 function of study month.

### 146 **Primary analysis**

147 Following the general framework for analyzing data from a stepped-wedge trial (Hussey and Hughes  
 148 2007; Hughes et al. 2015), for each outcome described above we will apply the following logistic mixed-  
 149 effect model (GLMM),

$$150 \quad \text{logit } P(Y_{ijm} = 1) = \alpha + \beta \text{Int}_{jm} + \gamma S_j + f(cm) + b_j + u_i,$$

151 where  $Y_{ijm}$  is the outcome for person  $i$  who visited site  $j$  in time interval  $m$ . As described above, the  
 152 intervals used in analyses are 28-day periods ("months" hereafter) before and after the launch date for  
 153 each clinic. The term  $\text{Int}_{jm}$  is an indicator variable for whether site  $j$  was in the post- versus pre-  
 154 implementation period as of that month. The term  $S_j$  is an indicator for whether site  $j$  was a Y2 site  
 155 versus a Y1 site (stratification variable), which accounts for possible differences in the outcome across  
 156 these two years of sites (Y1 and Y2), and  $f(cm)$  is a pre-specified function of calendar month to account  
 157 for the potential for a secular trend in outcome rates over time. We plan to model  $f(cm)$  using indicator  
 158 variables for each 4-month calendar period. Alternate specifications will be considered in a sensitivity  
 159 analysis (details below). Additionally,  $b_j \sim N(0, \tau_b^2)$  is a site-level random effect to account for correlation  
 160 of individuals from the same site and  $u_i \sim N(0, \tau_u^2)$  is a person-level random effect to account for  
 161 correlation of outcomes from the same individual, since a person can have a visit at multiple sites in the  
 162 same or different month, or at the same site over multiple months.

163 The primary comparison (1) described above will be evaluated by first conducting a two-sided Wald test  
 164 (at the 0.05 level) of the coefficient  $\beta$ . Ninety-five percent Wald confidence intervals (95% CI) for  $\beta$  will  
 165 also be calculated.

166 For descriptive purposes, from the model, we will estimate the marginal predicted probability of the  
 167 outcome in the pre- and post-implementation period by averaging over covariate distribution and the  
 168 random effects.

169 To test the contrasts for secondary time periods of interest, the term  $Int_{jm}$  will be replaced with a  
 170 categorical variable for whether the month was in the pre-, active implementation, or sustainment  
 171 period, and the relevant coefficient will be tested. For example, for testing whether there was a  
 172 difference in the outcome rates in the active versus pre-implementation period, we will test the null  
 173 hypothesis that the coefficient for the indicator for the active implementation period (versus the pre-  
 174 period) is equal to zero. As above, from the model we will estimate the marginal predicted probability  
 175 (and 95% CIs) of the outcome for each of the implementation periods.

## 176 **Secondary analyses**

### 177 **Variations in the definition of the brief intervention outcome were developed to reflect a new NCQA** 178 **alcohol screening and follow up measure.**

179 We will repeat our primary analysis for the following alternate specifications of the main brief  
 180 intervention outcome:

- 181 • Extend time window to 60 days to match NCQA
- 182 • Apply the NCQA definition of brief intervention, which includes codes irrespective of associated  
 183 text and excludes brief interventions identified via natural language processing and extends the  
 184 time window to 60 days.
- 185 • Only include brief interventions that were given in primary care clinics (the primary definition  
 186 allows BIs documented in other visit types).

### 187 **Variations in the definition of the AUD treatment outcome to reflect an updated NCQA measure and** 188 **longer time windows which might be important in primary care.**

189 We will repeat our primary analysis for the following alternate specifications of the main AUD treatment  
 190 outcome:

- 191 • Expand the types of visits included to allow for telephone encounters per NCQA 2018 HEDIS  
 192 measure
- 193 • Allow for a longer time window for treatment initiation and engagement as described in the  
 194 Protocol (Glass et al. 2018).
- 195 • Use a more stringent measure that only allows visits to count as treatment if they are to a  
 196 behavioral health provider, have a specialty addiction treatment code, or had a dispensed  
 197 prescription for AUD medication active at the time of the initiation or engagement visit(s) in the  
 198 same time windows as previously described from the new diagnosis (see Protocol, Glass et al.  
 199 2018)).

## 200 **Missing data**

201 Because the primary outcomes are defined based on the presence (or absence) of a recorded outcome  
 202 event in the EHR, we do not have missing outcome information. We also do not have any missingness in  
 203 covariates being adjusted for in the primary or secondary analyses (measures of implementation timing,  
 204 stratification variable). Some of the descriptive variables may have missingness, such as race/ethnicity,

205 which may be recorded as “unknown.” Missingness of any secondary outcomes or descriptive variables  
206 will be described.

207 One possible reason for a lack of documentation of an outcome could be due disenrollment from the  
208 health plan. To investigate this potential, we plan to examine the distribution of the number of days that  
209 a patient was enrolled within KPWA during the following time windows from the day of visit: the prior  
210 365 days, the following 14 days, and the following 44 days.

## 211 **References**

- 212 Bobb JF, Lee AK, Lapham GT, Oliver M, Ludman E, Achtmeyer C, Parrish R, Caldeiro RM, Lozano P,  
213 Richards JE, Bradley KB (2017). Evaluation of a pilot implementation to integrate alcohol-related care  
214 within primary care. *International Journal of Environmental Research and Public Health*. 14(9). pii:  
215 E1030.
- 216 Glass JE, Bobb JF, Lee AK, Richards JE, Lapham GT, Ludman E, Achtmeyer C, Caldeiro RM,  
217 Parrish R, Williams EC, Lozano P, Bradley KA (2018). Study protocol: a cluster randomized trial  
218 implementing sustained patient-centered alcohol-related care (SPARC Trial). *Implementation  
219 Science*. 13:108.
- 220 Hemming K, Taljaard M, Forbes A (2017). Analysis of cluster randomised stepped wedge trials with  
221 repeated cross-sectional samples. *Trials*. 18(1):101.
- 222 Hemming K, Taljaard M, McKenzie JE, Hooper R, Copas A, Thompson JA, Dixon-Woods M, Aldcroft A,  
223 Doussau A, Grayling M, Kristunas C, Goldstein CE, Campbell MK, Girling A, Eldridge S, Campbell MJ,  
224 Lilford R, Weijer C, Forbes A, Grimshaw, JM (2018). Reporting of The CONSORT extension for  
225 SteppedWedge Cluster Randomised Trials: Extension of the CONSORT 2010 statement with explanation  
226 and elaboration. *BMJ*.  
227 [https://research.birmingham.ac.uk/portal/files/50005963/CONSORT\\_SW\\_accepted\\_version.pdf](https://research.birmingham.ac.uk/portal/files/50005963/CONSORT_SW_accepted_version.pdf)
- 228 Halekoh U, Højsgaard S (2014). A Kenward-Roger approximation and parametric bootstrap methods for  
229 tests in linear mixed models—the R package pbrtest. *Journal of Statistical Software*. 59(9):1-30.
- 230 Hughes JP, Granston TS, Heagerty PJ (2015). Current Issues in the Design and Analysis of Stepped Wedge  
231 Trials. *Contemporary Clinical Trials*. 45:55-60.
- 232 Hussey A, Hughes JP (2007). “Design and Analysis of Stepped Wedge Cluster Randomized Trials.”  
233 *Contemporary Clinical Trials* 28, no. 2: 182–91.
- 234 Kahan BC, Forbes G, Ali Y, Jairath V, Bremner S, Harhay MO, Hooper R, Wright N, Eldridge SM, Leyrat C.  
235 Increased risk of type I errors in cluster randomised trials with small or medium numbers of clusters: a  
236 review, reanalysis, and simulation study. *Trials*. 2016 Dec;17(1):438.
- 237 Li P, Redden DT. Comparing denominator degrees of freedom approximations for the generalized linear  
238 mixed model in analyzing binary outcome in small sample cluster-randomized trials. *BMC medical  
239 research methodology*. 2015 Dec;15(1):38.
