# Supplementary material
Source: PubMed Central journal article supplement (PMC9972247)
Supplement: jamainternmed-e227083-s003.pdf [file jamainternmed-e227083-s003.pdf]

## Data Sharing Statement

Lee. Integrating Alcohol-Related Prevention and Treatment Into Primary Care. *JAMA Intern Med.* Published February 27, 2023. doi:10.1001/jamainternmed.2022.7083

### Data

**Data available:** No

### Additional Information

**Explanation for why data not available:** We do not have permission from the health system to share the data.
